# Supplementary material
Source: PubMed Central journal article supplement (PMC7806206)
Supplement: NIHMS1652421-supplement-1.pdf [file NIHMS1652421-supplement-1.pdf]

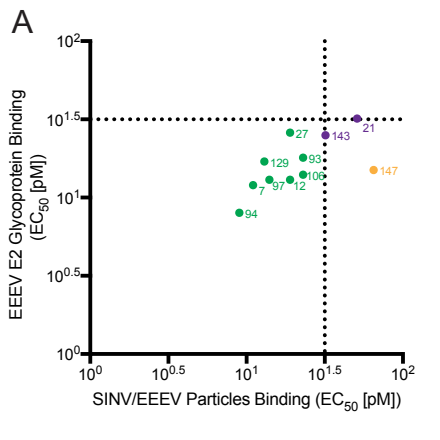

**Legend**

**Fab:**

- SINV/EEEV Particles
- EEEV E2 Glycoprotein
- EEEV E1 Glycoprotein

**IgG1:**

- SINV/EEEV Particles
- EEEV E2 Glycoprotein
- EEEV E1 Glycoprotein

**IgA1:**

- ▲ SINV/EEEV Particles
- ▲ EEEV E2 Glycoprotein
- ▲ EEEV E1 Glycoprotein

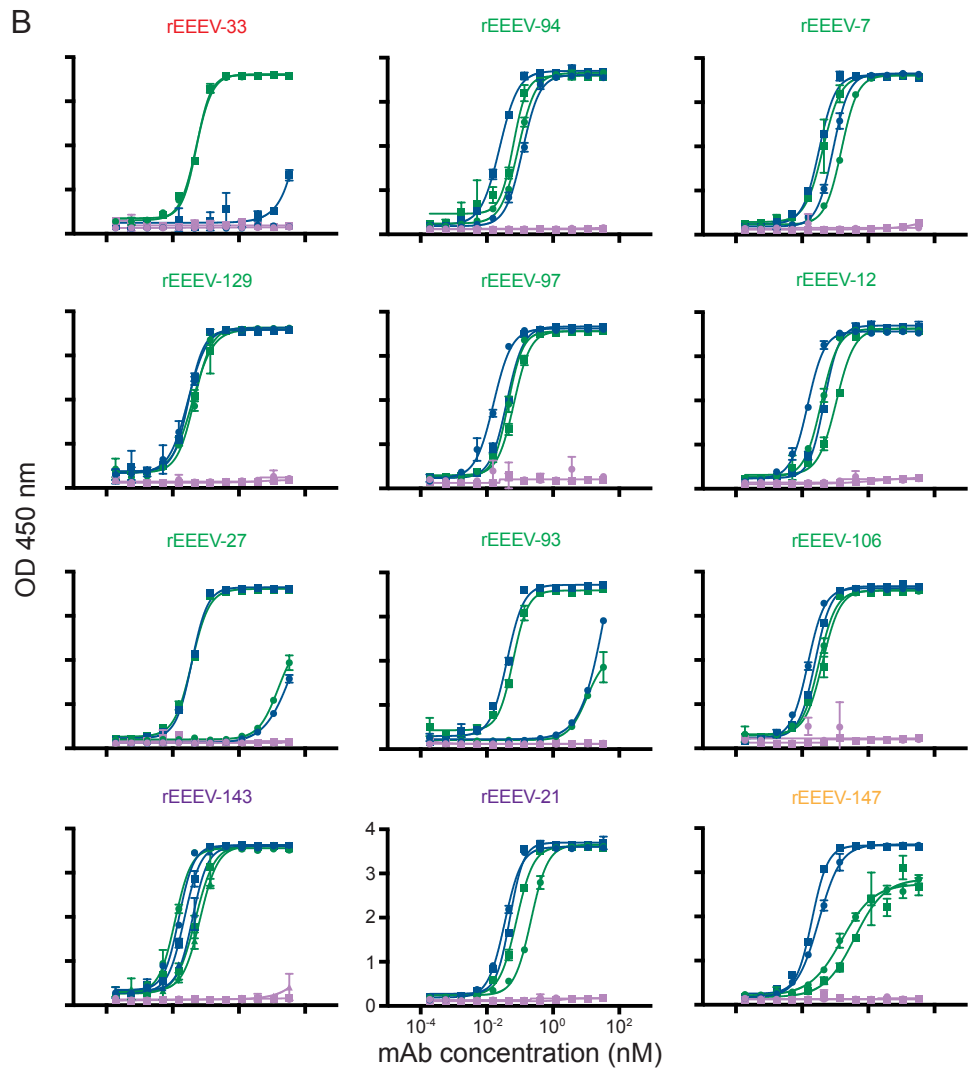

**C**

| EEEV mAb | Antibody Isotype (Heavy Chain, Light Chain) | IgG1 (IgA1)         | Fab   | IgG1 (IgA1)          | Fab   | IgG1                                 | Fab | SINV/EEEV particles            | EEEV E2 glycoprotein |
|----------|---------------------------------------------|---------------------|-------|----------------------|-------|--------------------------------------|-----|--------------------------------|----------------------|
|          |                                             | SINV/EEEV particles |       | EEEV E2 glycoprotein |       | Virus/Protein EC <sub>50</sub> Ratio |     | IgG/Fab EC <sub>50</sub> Ratio |                      |
| EEEV-33  | IgG1 $\lambda$                              | 51.1                | 52.5  | >                    | >     | 0.0                                  | 0.0 | 1.0                            | NA                   |
| EEEV-94  | IgG1 $\kappa$                               | 63.1                | 89.4  | 24.3                 | 119.9 | 2.6                                  | 0.7 | 0.7                            | 0.2                  |
| EEEV-7   | IgG1 $\kappa$                               | 42.7                | 154.1 | 32.8                 | 85.5  | 1.3                                  | 1.8 | 0.3                            | 0.4                  |
| EEEV-129 | IgG1 $\lambda$                              | 39.9                | 45.0  | 30.2                 | 29.0  | 1.3                                  | 1.6 | 0.9                            | 1.0                  |
| EEEV-97  | IgG1 $\lambda$                              | 65.9                | 43.8  | 39.9                 | 16.0  | 1.7                                  | 2.7 | 1.5                            | 2.5                  |
| EEEV-12  | IgG1 $\lambda$                              | 108.1               | 38.0  | 46.7                 | 14.7  | 2.3                                  | 2.6 | 2.8                            | 3.2                  |
| EEEV-27  | IgG1 $\lambda$                              | 37.6                | >     | 37.6                 | >     | 1.0                                  | >   | NA                             | NA                   |
| EEEV-93  | IgG1 $\lambda$                              | 62.1                | >     | 40.8                 | >     | 1.5                                  | >   | NA                             | NA                   |
| EEEV-106 | IgG1 $\kappa$                               | 41.7                | 32.3  | 24.6                 | 15.1  | 1.7                                  | 2.1 | 1.3                            | 1.6                  |
| EEEV-143 | IgA1 $\kappa$                               | 48.3 (67.5)         | 11.9  | 22.3 (39.6)          | 15.4  | 2.2                                  | 0.8 | 4.1                            | 1.4                  |
| EEEV-21  | IgG1 $\lambda$                              | 78.2                | 216.2 | 49.8                 | 34.9  | 1.6                                  | 6.2 | 0.4                            | 1.4                  |
| EEEV-147 | IgG1 $\kappa$                               | 385.0               | 158.5 | 19.9                 | 32.0  | 19.3                                 | 5.0 | 2.4                            | 0.6                  |
