# Supplementary material
Source: PubMed Central journal article supplement (PMC7806206)
Supplement: NIHMS1652421-supplement-8.pdf [file NIHMS1652421-supplement-8.pdf]

**TABLE S1, Related to Figures 3, S2, and S3. Summary table of EEEV E2 neutralizing antigenic determinants recognized by human anti-EEEV mAbs.**

| <b>EEEV mAb</b> | <b>E2 Domain</b>                  | <b>Critical EEEV E2 alanine residues<sup>a</sup></b>         | <b>Allosteric EEEV E2 alanine residues<sup>b</sup></b>                    | <b>Reduction in neutralization potency for SINV/EEEV escape mutant viruses<sup>c</sup></b> |
|-----------------|-----------------------------------|--------------------------------------------------------------|---------------------------------------------------------------------------|--------------------------------------------------------------------------------------------|
| EEEV-12         | A                                 | No reduction                                                 | N/A                                                                       | M68T (L227R)                                                                               |
| EEEV-33         | A<br>(N-link/A/Arch 1/B/Arch 2)   | <b>9, 74, 116, 118, 120</b>                                  | <b>34, 163, 166, 172, 240</b>                                             | (M68T)                                                                                     |
| EEEV-147        | N-link/Arch 1                     | <b>9, 10</b>                                                 | <b>163, 166</b>                                                           | Minimal reduction                                                                          |
| EEEV-7          | B                                 | <b>205, 206, 207, 213</b>                                    | N/A                                                                       | M68T                                                                                       |
| EEEV-106        | B                                 | <b>205, 206, 207, 213</b>                                    | N/A                                                                       | M68T                                                                                       |
| EEEV-27         | A/B<br>(N-link/A/Arch 1/B/Arch 2) | <b>9, 73, 178, 186, 190, 202, 205-207, 213-216, 222, 229</b> | <b>33-34, 65, 98, 109, 128, 145, 163, 165-166, 172, 185, 226-227, 240</b> | M68T                                                                                       |
| EEEV-129        | B                                 | <b>205, 207, 213</b>                                         | N/A                                                                       | M68T                                                                                       |
| EEEV-21         | B                                 | <b>178, 194, 202, 205, 207, 213, 215</b>                     | <b>185</b>                                                                | (M68T)                                                                                     |
| EEEV-94         | A/B<br>(N-link/A/B)               | <b>9, 202, 205, 215</b>                                      | <b>33, 185</b>                                                            | Minimal reduction                                                                          |

|          |                                      |                                                   |                                                                           |                       |
|----------|--------------------------------------|---------------------------------------------------|---------------------------------------------------------------------------|-----------------------|
| EEEV-143 | B                                    | <b>202</b>                                        | N/A                                                                       | (M68T)                |
| EEEV-93  | A/B<br>(N-link/A/Arch<br>1/B/Arch 2) | <b>9, 73, 178, 202, 205-<br/>206, 215-216</b>     | <b>33-34, 98, 128,<br/>145, 163, 165-<br/>166, 172, 185,<br/>226, 240</b> | M68T, L227R           |
| EEEV-97  | B                                    | <b>178, 190, 200, 202,<br/>207, 215, 219, 222</b> | <b>185</b>                                                                | M68T, G192R,<br>L227R |

<sup>a</sup> Surface-exposed critical alanine residues (<25% binding relative to WT) are identified as determined through alanine-scanning mutagenesis library analyses for each mAb. See **Figure 3B** for a heat map representation of average percent binding of human anti-EEEV mAbs to critical residues and **Figure S2** for bar graph representation of human anti-EEEV mAb binding to critical residues.

<sup>b</sup> Critical alanine residues (<25% binding relative to WT) that are not surface exposed, as determined through alanine-scanning mutagenesis library analyses for each mAb are identified. The identified residues may result in a loss of binding phenotype due to allosteric effects on the epitope. N/A = not applicable

<sup>c</sup> Neutralization potency of human anti-EEEV mAbs for the SINV/EEEV escape mutant viruses (M68T, G192R, and L227R). Minimal reduction indicates that neutralization potency of respective human anti-EEEV mAb is similar to neutralization activity against WT SINV/EEEV. Escape mutants with a >10-fold reduction in neutralization potency are indicated for each mAb. Parentheses include escape mutants with > 5-fold reduction in neutralization potency. See **Figure S3** for neutralization curves of human anti-EEEV mAbs to SINV/EEEV escape mutant viruses (M68T, G192R, and L227R).

**Bold** indicates residues distinct from those previously identified with a loss-of-binding phenotype for the murine anti-EEEV mAbs (Kim et al., 2019).

**Table S2, Related to STAR Methods. Parameters used for high-resolution data collection of SINV/EEEV:rEEEV-33 Fab, SINV/EEEV:rEEEV-143 Fab, EEEV VLP, and EEEV VLP:rEEEV-143 Fab.**

|                                          | <b>Parameters</b>                                  | <b>SINV/EEEV:<br/>rEEEV-33<br/>Fab</b> | <b>SINV/EEEV:<br/>rEEEV-143<br/>Fab</b> | <b>EEEV VLP</b> | <b>EEEV VLP:<br/>rEEEV-143<br/>Fab</b> |
|------------------------------------------|----------------------------------------------------|----------------------------------------|-----------------------------------------|-----------------|----------------------------------------|
| Data<br>Deposition                       | EMDB                                               | 22223                                  | 22188                                   | 22276           | 22277                                  |
|                                          | PDB                                                |                                        |                                         | 6XO4            | 6XOB                                   |
| Microscope<br>setting                    | Microscope                                         | Titan-Krios                            | Glacios                                 | Titan Krios     | Titan Krios                            |
|                                          | Acceleration<br>voltage (kV)                       | 300                                    | 200                                     | 300             | 300                                    |
|                                          | Detector                                           |                                        |                                         | Falcon 3EC      | Falcon 3EC                             |
|                                          | Magnification (x)                                  | 18,000                                 | 22,000                                  | 96,000          | 75,000                                 |
|                                          | Pixel size (Å)                                     | 1.64                                   | 2.0                                     | 0.8608          | 1.11                                   |
|                                          | Dose Exposure (e <sup>-</sup><br>/Å <sup>2</sup> ) | 50                                     | 25                                      | 30              | 30                                     |
|                                          | Defocus range (µm)                                 | 1.0 – 2.5                              | 1.0 – 2.5                               | 0.8-2           | 1-2.5                                  |
| Data                                     | # Micrographs                                      |                                        |                                         | 1,745           | ~4,800                                 |
|                                          | # particles                                        | ~18,000                                | ~10,000                                 | 3,935           | 3,600                                  |
|                                          | # particle after 2D                                | ~12,900                                | ~7,200                                  | 3,569           | 2,471                                  |
|                                          | Final particles #                                  | ~12,900                                | ~7,200                                  | 3,469           | 1,300                                  |
|                                          | Symmetry                                           | icosahedral                            | icosahedral                             | icosahedral     | icosahedral                            |
|                                          | Resolution<br>FSC=0.143 (Å)                        | 7.2                                    | 8.3                                     | 4.2             | 8.5                                    |
| Model<br>refinement<br>and<br>validation | Protein residues                                   | -                                      | -                                       | 3,992           | 5,700                                  |
|                                          | Map CC                                             | -                                      | -                                       | 0.79            | 0.69                                   |
|                                          | Bond lengths<br>(Å)                                | -                                      | -                                       | 0.006           | 0.004                                  |
|                                          | Bond angles                                        | -                                      | -                                       | 0.671           | 0.816                                  |
|                                          | Ramachandran                                       | -                                      | -                                       |                 |                                        |
|                                          | Outliers (%)                                       | -                                      | -                                       | 0               | 0                                      |
|                                          | Allowed (%)                                        | -                                      | -                                       | 10.93           | 21.64                                  |
|                                          | Favored (%)                                        | -                                      | -                                       | 89.07           | 78.36                                  |
|                                          | Poor rotamers (%)                                  | -                                      | -                                       | 5.41            | 21.99                                  |
|                                          | MolProbity score                                   | -                                      | -                                       | 2.9             | 3.98                                   |
|                                          | Clash score                                        | -                                      | -                                       | 18.8            | 53.27                                  |
|                                          | CaBLAM score                                       | -                                      | -                                       | 6.42            | 7.28                                   |
