# Supplementary material
Source: PubMed Central journal article supplement (PMC7806206)

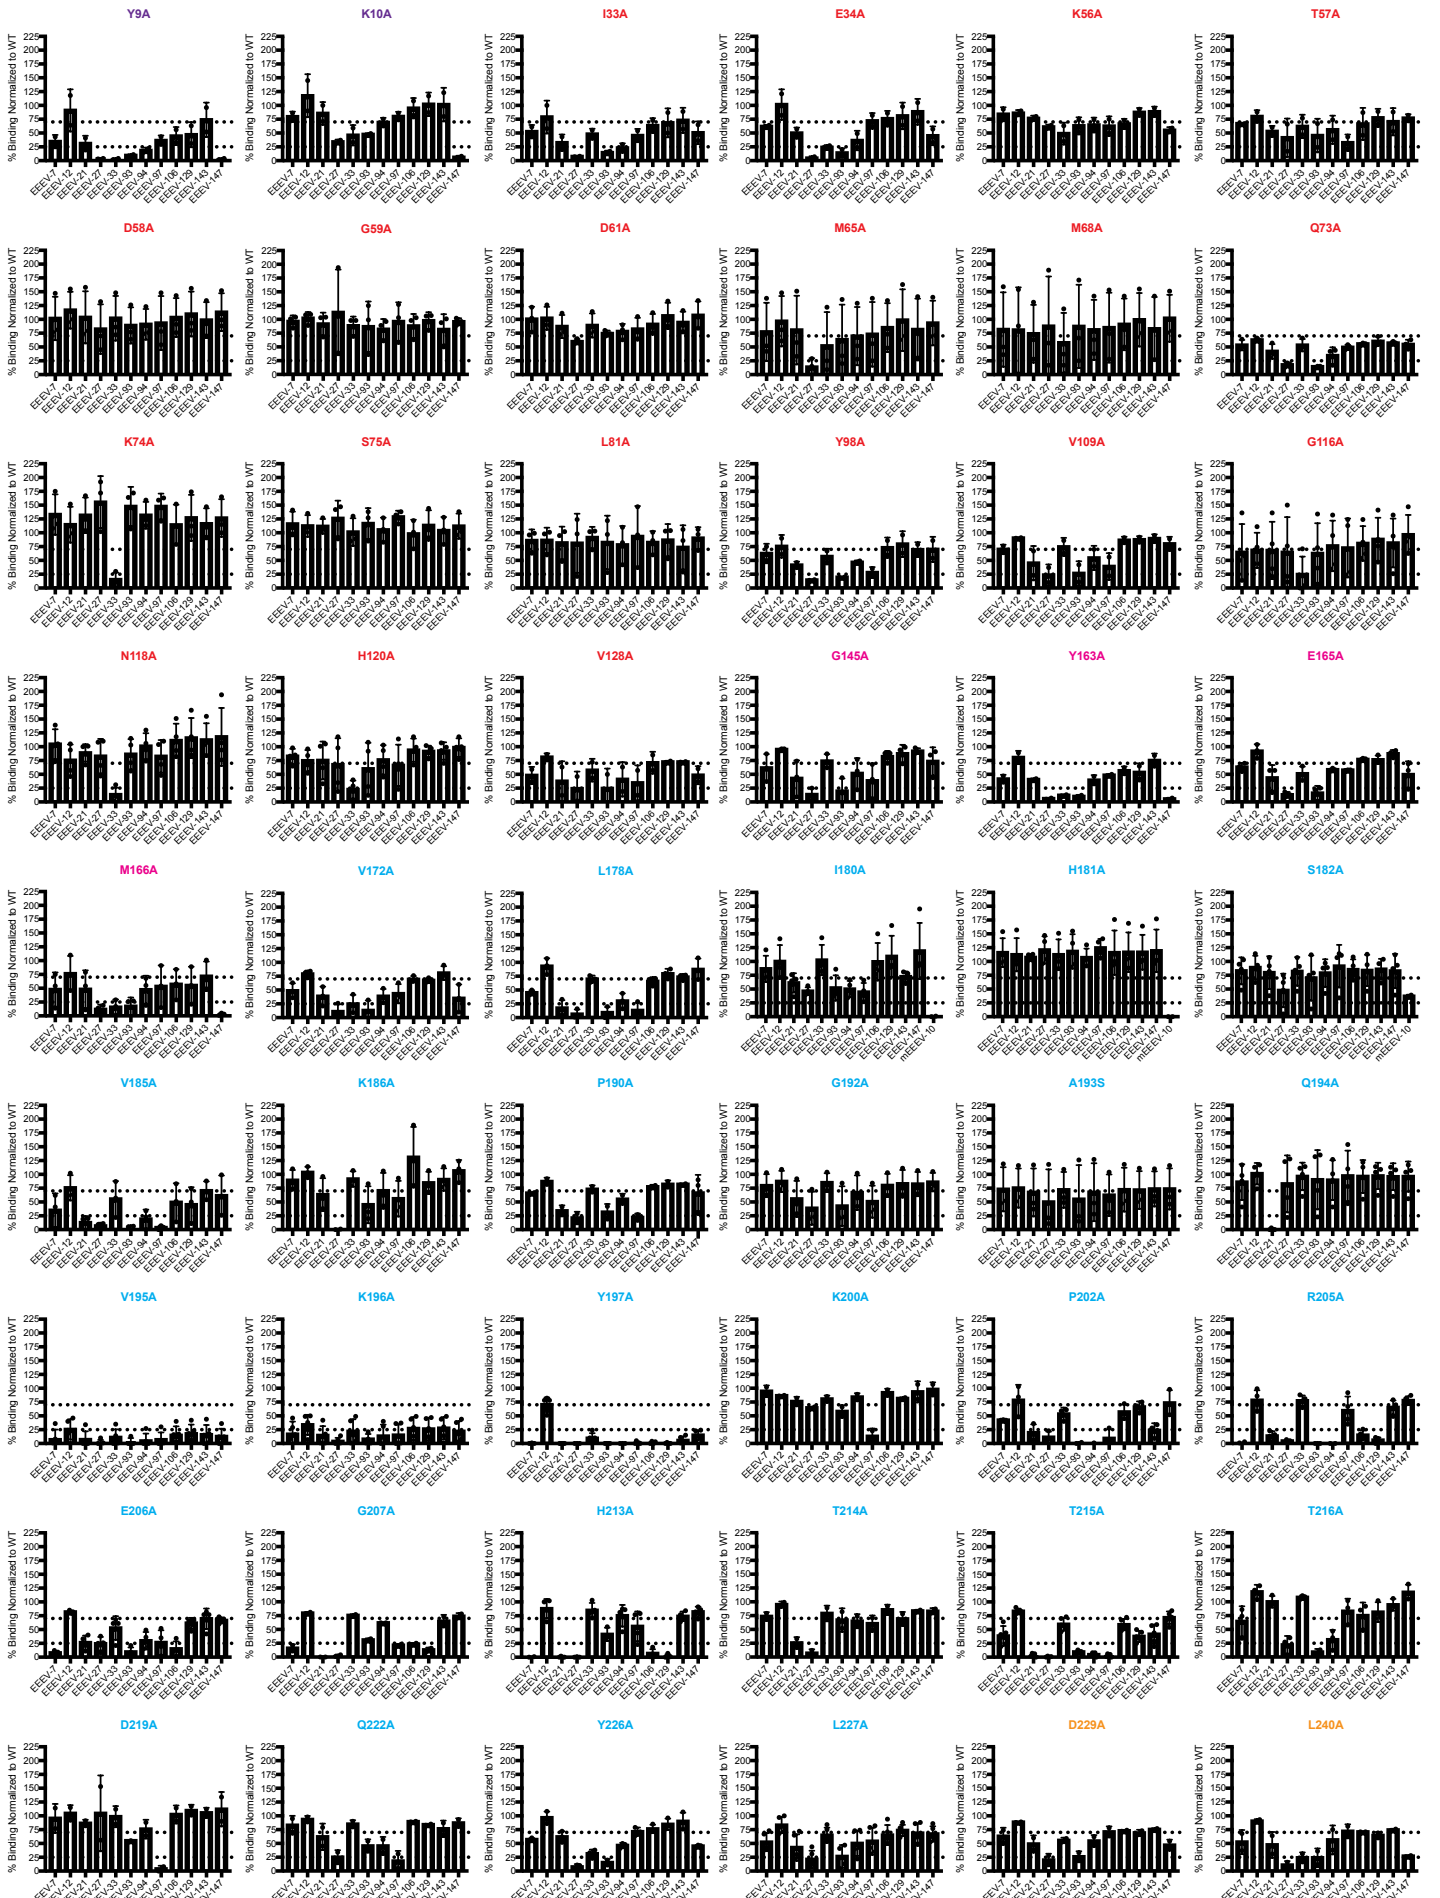

Supplement: NIHMS1652421-supplement-2.pdf [file NIHMS1652421-supplement-2.pdf]

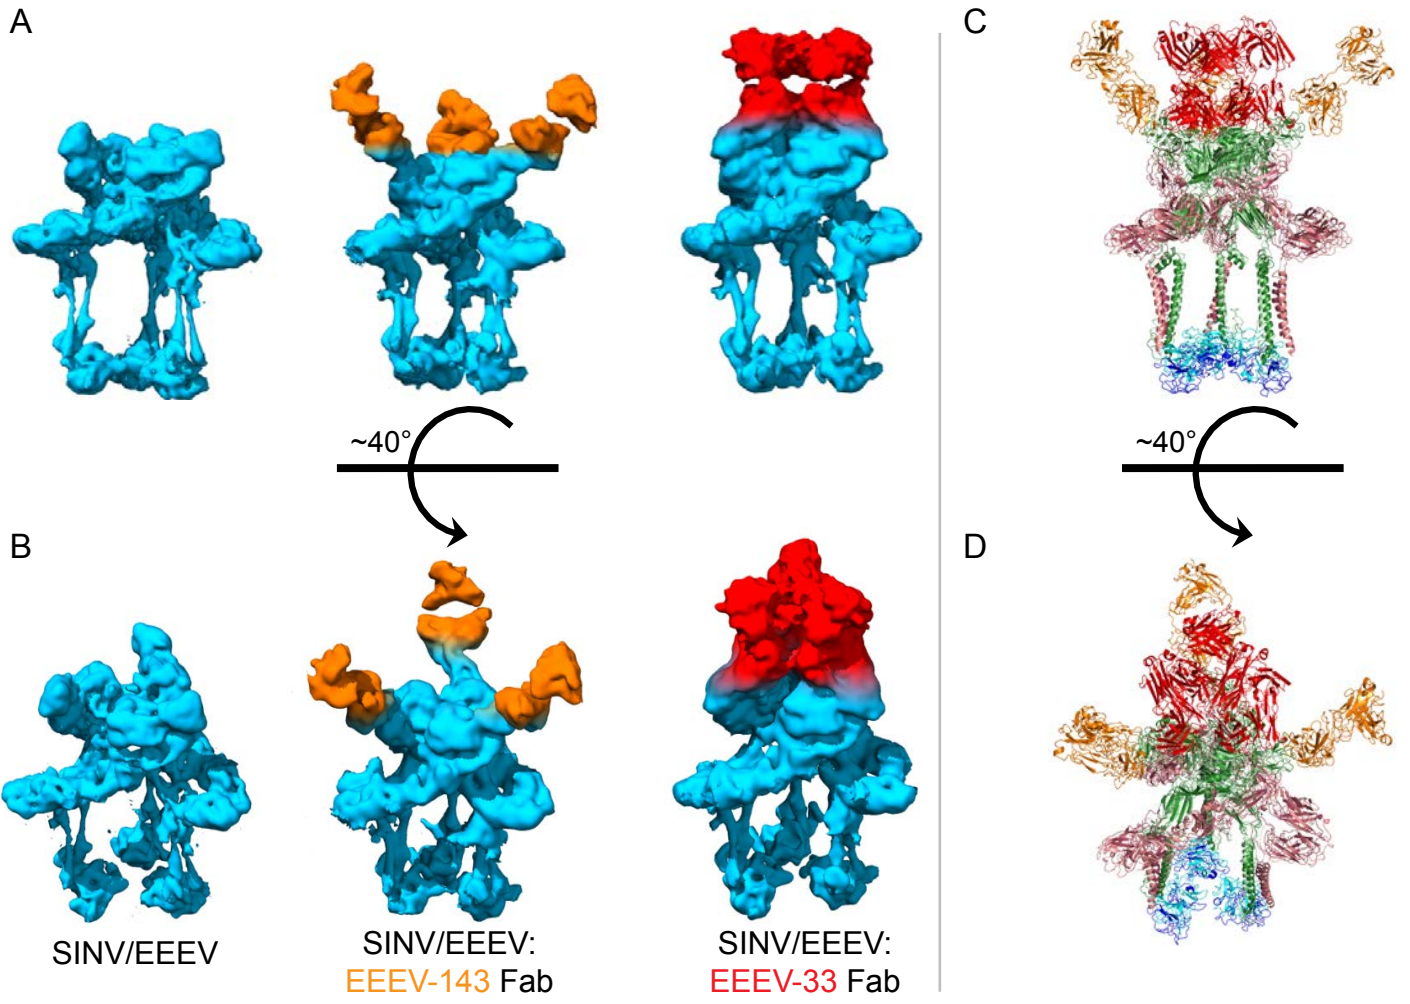

Supplement: NIHMS1652421-supplement-4.pdf [file NIHMS1652421-supplement-4.pdf]

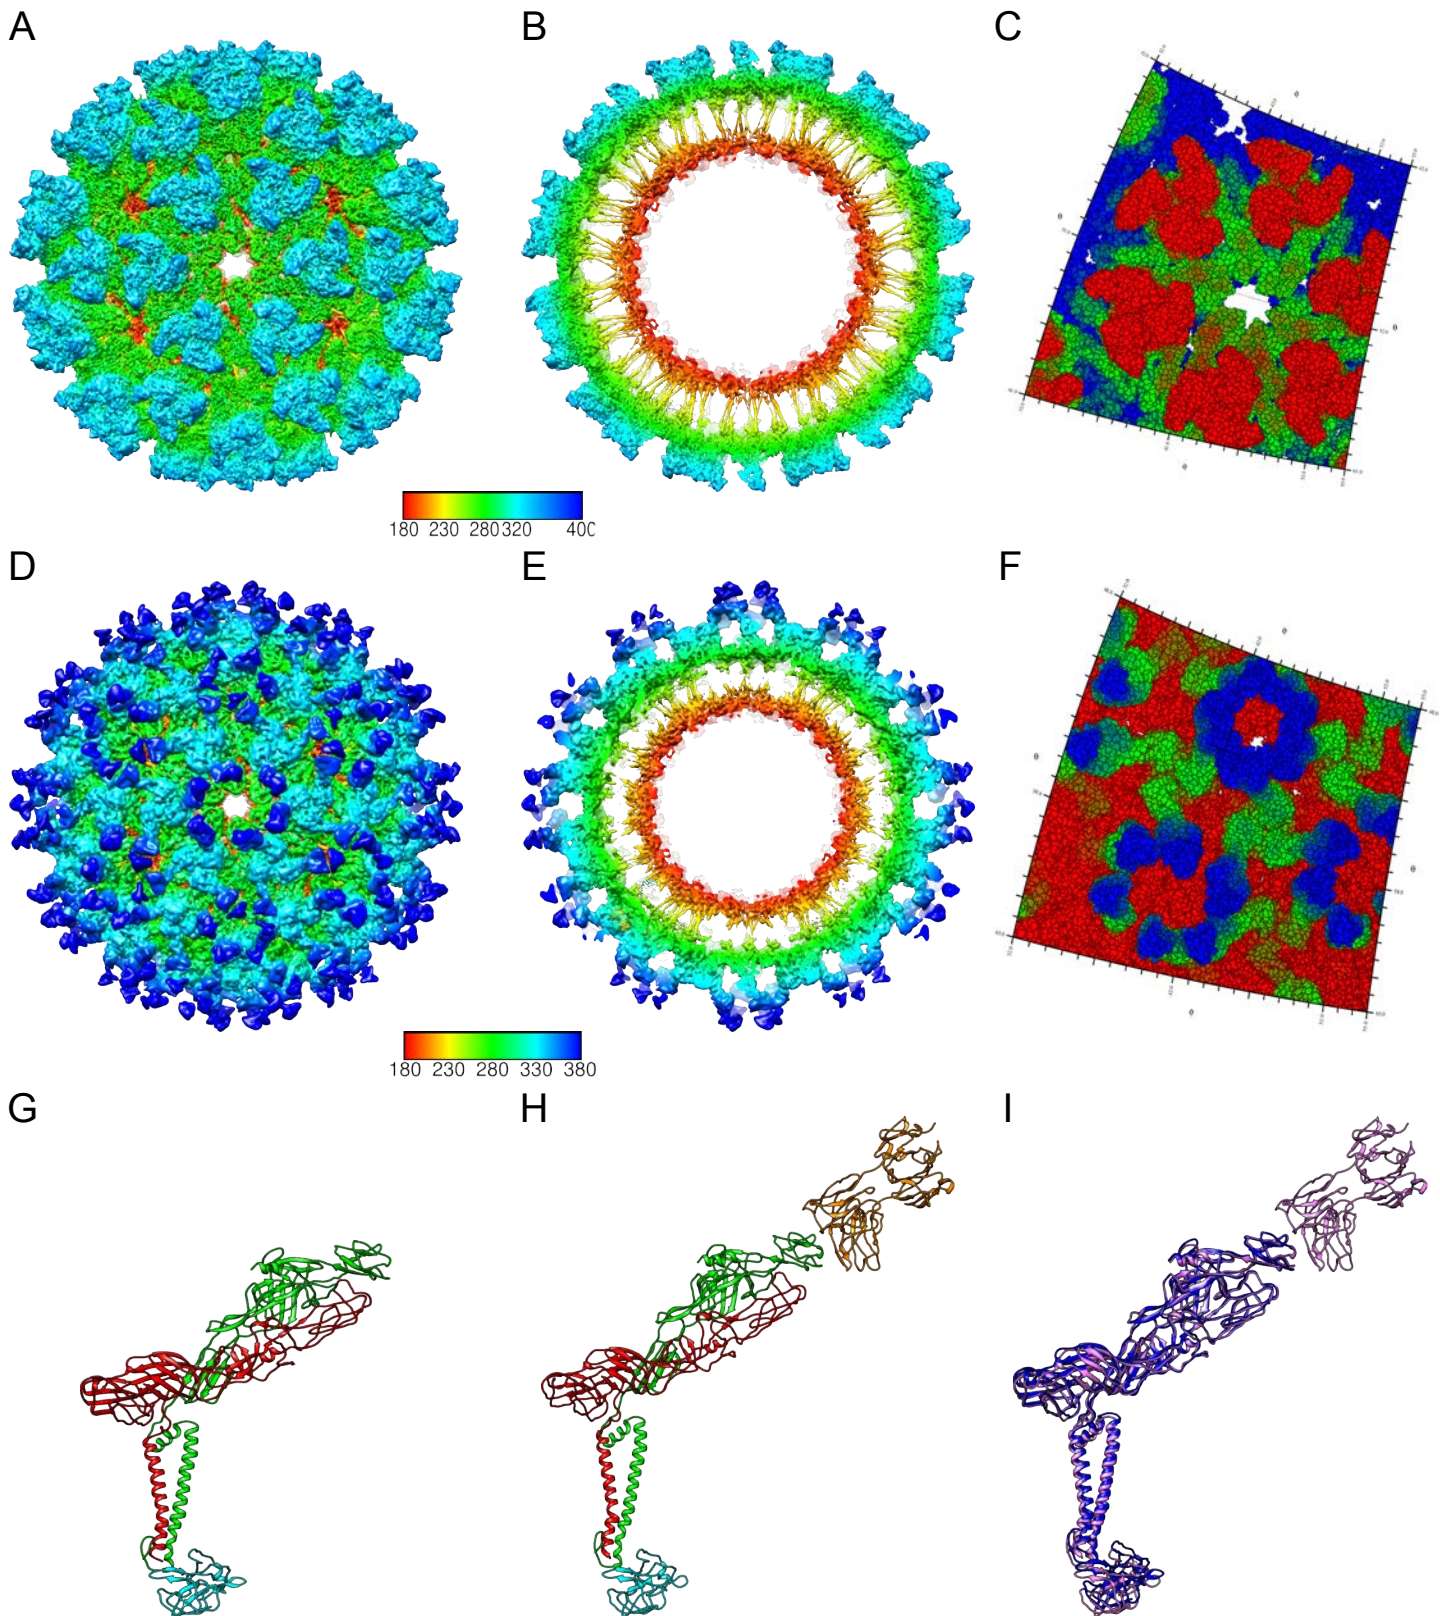

Supplement: NIHMS1652421-supplement-5.pdf [file NIHMS1652421-supplement-5.pdf]

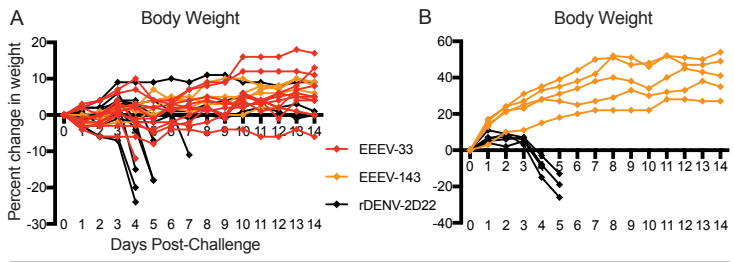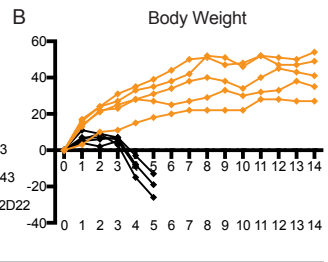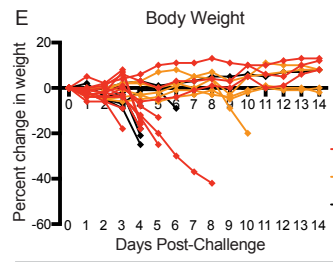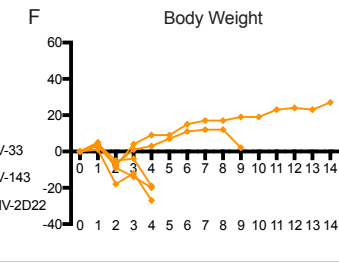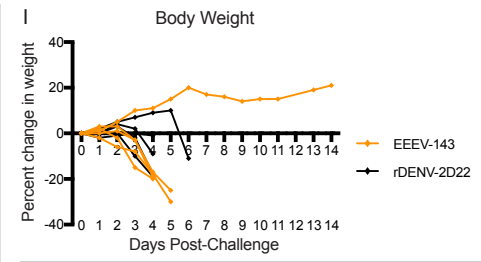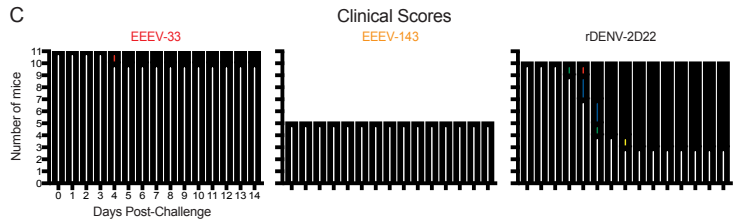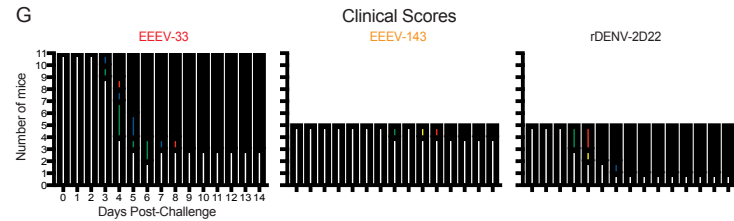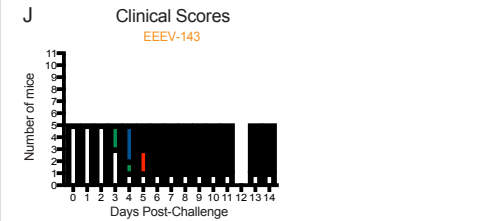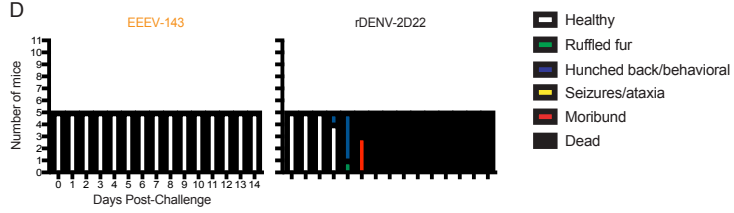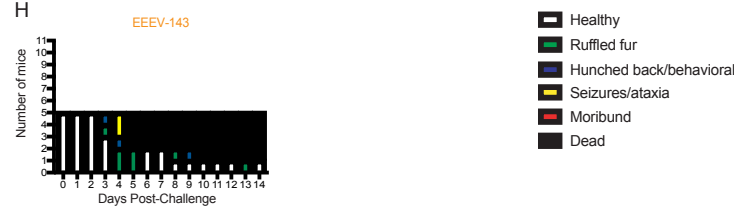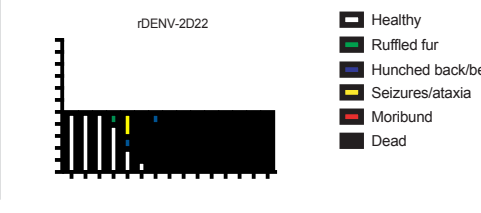

Supplement: NIHMS1652421-supplement-6.pdf [file NIHMS1652421-supplement-6.pdf]

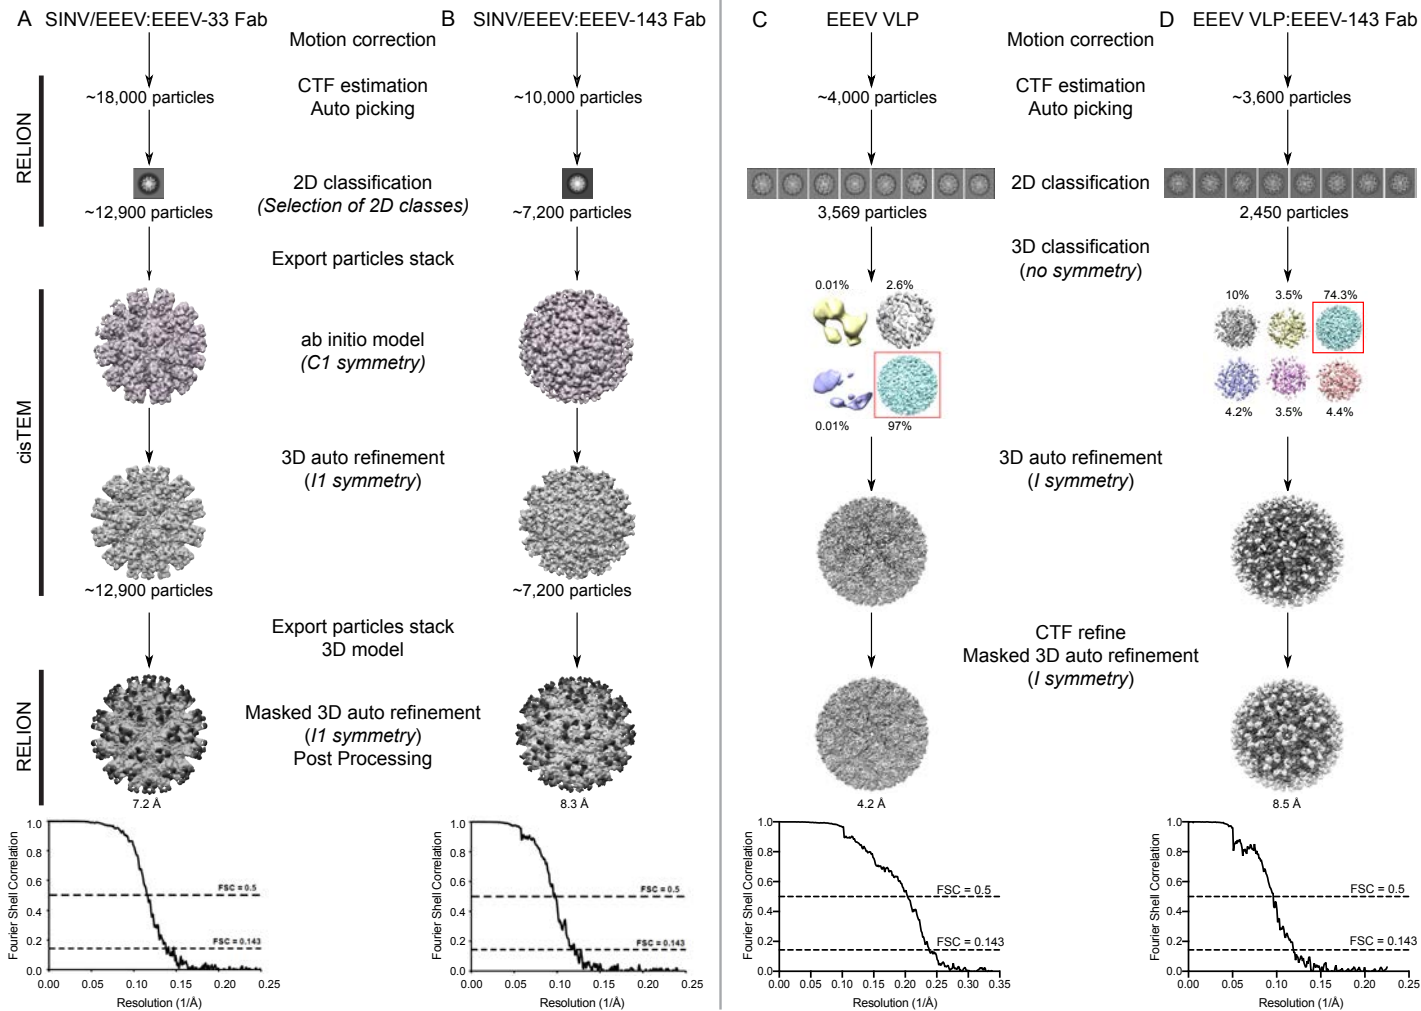

Supplement: NIHMS1652421-supplement-7.pdf [file NIHMS1652421-supplement-7.pdf]
